# Supplementary material
Source: publisher figshare collection journal article supplement (https://acs.figshare.com/ndownloader/files/4219396)
Supplement: Supplementary file 1 [file 4219396]

data_dk296 
 
_audit_creation_method            SHELXL-97 
_chemical_name_systematic 
; 
4-(carboxymethyl)benzenediazonium tetrafluoroborate 
; 
_chemical_name_common             ? 
_chemical_melting_point           ? 
_chemical_compound_source         'synthesized'
_chemical_formula_iupac           'C8 H7 B F4 N2 O2'
_chemical_formula_moiety          'C8H7N2O2.BF4'
_chemical_formula_sum             'C8 H7 B F4 N2 O2' 
_chemical_formula_weight          249.97 
 
loop_ 
 _atom_type_symbol 
 _atom_type_description 
 _atom_type_scat_dispersion_real 
 _atom_type_scat_dispersion_imag 
 _atom_type_scat_source 
 'C'  'C'   0.0033   0.0016 
 'International Tables Vol C Tables 4.2.6.8 and 6.1.1.4' 
 'H'  'H'   0.0000   0.0000 
 'International Tables Vol C Tables 4.2.6.8 and 6.1.1.4' 
 'B'  'B'   0.0013   0.0007 
 'International Tables Vol C Tables 4.2.6.8 and 6.1.1.4' 
 'F'  'F'   0.0171   0.0103 
 'International Tables Vol C Tables 4.2.6.8 and 6.1.1.4' 
 'N'  'N'   0.0061   0.0033 
 'International Tables Vol C Tables 4.2.6.8 and 6.1.1.4' 
 'O'  'O'   0.0106   0.0060 
 'International Tables Vol C Tables 4.2.6.8 and 6.1.1.4' 
 
_symmetry_cell_setting            'monoclinic' 
_symmetry_space_group_name_H-M    'P 21/n'
_symmetry_space_group_name_hall   '-P 2yn'
 
loop_ 
 _symmetry_equiv_pos_as_xyz 
 'x, y, z' 
 '-x+1/2, y+1/2, -z+1/2' 
 '-x, -y, -z' 
 'x-1/2, -y-1/2, z-1/2' 
 
_cell_length_a                    5.4007(10) 
_cell_length_b                    16.268(3) 
_cell_length_c                    11.926(2) 
_cell_angle_alpha                 90.00 
_cell_angle_beta                  102.814(13) 
_cell_angle_gamma                 90.00 
_cell_volume                      1021.7(3) 
_cell_formula_units_Z             4 
_cell_measurement_temperature     90(2) 
_cell_measurement_reflns_used     2919
_cell_measurement_theta_min        2.5
_cell_measurement_theta_max        32.5
                       
_exptl_crystal_description        'needle fragment' 
_exptl_crystal_colour             yellow 
_exptl_crystal_size_max           0.22 
_exptl_crystal_size_mid           0.08 
_exptl_crystal_size_min           0.07 
_exptl_crystal_density_meas       ? 
_exptl_crystal_density_diffrn     1.625 
_exptl_crystal_density_method     'not measured' 
_exptl_crystal_F_000              504 
_exptl_absorpt_coefficient_mu     0.162 
_exptl_absorpt_correction_type    none 
_exptl_absorpt_correction_T_min   ? 
_exptl_absorpt_correction_T_max   ? 
_exptl_absorpt_process_details    ? 
 
_exptl_special_details 
; 
 ? 
; 
 
_diffrn_ambient_temperature       90(2) 
_diffrn_radiation_wavelength      0.71073 
_diffrn_radiation_type            MoK\a 
_diffrn_radiation_source          'fine-focus sealed tube' 
_diffrn_radiation_monochromator   graphite 
_diffrn_measurement_device_type   'Nonius KappaCCD (with Oxford Cryostream)' 
_diffrn_measurement_method        '\w scans with \k offsets' 
_diffrn_detector_area_resol_mean  ? 
_diffrn_standards_number          ? 
_diffrn_standards_interval_count  ? 
_diffrn_standards_interval_time   ? 
_diffrn_standards_decay_%         none 
_diffrn_reflns_number             14147
_diffrn_reflns_av_R_equivalents   0.0336 
_diffrn_reflns_av_sigmaI/netI     0.0514 
_diffrn_reflns_limit_h_min        -7 
_diffrn_reflns_limit_h_max        7 
_diffrn_reflns_limit_k_min        -24 
_diffrn_reflns_limit_k_max        21 
_diffrn_reflns_limit_l_min        -17 
_diffrn_reflns_limit_l_max        17 
_diffrn_reflns_theta_min          3.06 
_diffrn_reflns_theta_max          32.47 
_diffrn_measured_fraction_theta_max    0.921 
_diffrn_reflns_theta_full              32.47 
_diffrn_measured_fraction_theta_full   0.921 
_reflns_number_total              3397 
_reflns_number_gt                 2366 
_reflns_threshold_expression      'I >2\s(I)' 
 
_computing_data_collection        'COLLECT (Nonius, 2000)' 
_computing_cell_refinement        'Denzo&Scalepack (Otwinowski&Minor, 1997)' 
_computing_data_reduction          Denzo&Scalepack
_computing_structure_solution     'SHELXS97 (Sheldrick, 1997)' 
_computing_structure_refinement   'SHELXL97 (Sheldrick, 1997)' 
_computing_molecular_graphics     'PLATON (Spek, 2003)' 
_computing_publication_material   SHELXL97
  
_refine_special_details 
; 
 Refinement of F^2^ against ALL reflections.  The weighted R-factor wR and 
 goodness of fit S are based on F^2^, conventional R-factors R are based 
 on F, with F set to zero for negative F^2^. The threshold expression of 
 F^2^ > 2sigma(F^2^) is used only for calculating R-factors(gt) etc. and is 
 not relevant to the choice of reflections for refinement.  R-factors based 
 on F^2^ are statistically about twice as large as those based on F, and R- 
 factors based on ALL data will be even larger. 
; 
 
_refine_ls_structure_factor_coef  Fsqd  
_refine_ls_matrix_type            full 
_refine_ls_weighting_scheme       calc  
_refine_ls_weighting_details 
 'calc w=1/[\s^2^(Fo^2^)+(0.0337P)^2^+0.4089P] where P=(Fo^2^+2Fc^2^)/3' 
_atom_sites_solution_primary      direct 
_atom_sites_solution_secondary    difmap 
_atom_sites_solution_hydrogens    geom 
_refine_ls_hydrogen_treatment     refall 
_refine_ls_extinction_method      none 
_refine_ls_extinction_coef        ? 
_refine_ls_number_reflns          3397 
_refine_ls_number_parameters      182 
_refine_ls_number_restraints      0 
_refine_ls_R_factor_all           0.0762 
_refine_ls_R_factor_gt            0.0443 
_refine_ls_wR_factor_ref          0.0978 
_refine_ls_wR_factor_gt           0.0864 
_refine_ls_goodness_of_fit_ref    1.021 
_refine_ls_restrained_S_all       1.021 
_refine_ls_shift/su_max           0.000 
_refine_ls_shift/su_mean          0.000 
_refine_diff_density_max          0.318 
_refine_diff_density_min         -0.269 
_refine_diff_density_rms          0.061 
 
loop_ 
 _atom_site_label 
 _atom_site_type_symbol 
 _atom_site_fract_x 
 _atom_site_fract_y 
 _atom_site_fract_z 
 _atom_site_U_iso_or_equiv 
 _atom_site_adp_type 
 _atom_site_occupancy 
 _atom_site_symmetry_multiplicity 
 _atom_site_calc_flag 
 _atom_site_refinement_flags 
 _atom_site_disorder_assembly 
 _atom_site_disorder_group 
C1 C 0.6652(3) -0.12168(9) 0.31362(12) 0.0177(3) Uani 1 1 d . . . 
C2 C 0.7407(3) -0.19224(9) 0.37675(12) 0.0188(3) Uani 1 1 d . . . 
C3 C 0.9849(3) -0.19245(8) 0.44472(11) 0.0157(3) Uani 1 1 d . . . 
C4 C 1.1552(3) -0.12703(9) 0.45505(12) 0.0170(3) Uani 1 1 d . . . 
C5 C 1.0732(3) -0.05817(9) 0.39014(12) 0.0176(3) Uani 1 1 d . . . 
C6 C 0.8305(2) -0.05512(9) 0.31764(11) 0.0160(3) Uani 1 1 d . . . 
C7 C 0.7551(3) 0.01738(9) 0.23944(12) 0.0190(3) Uani 1 1 d . . . 
C8 C 0.8714(2) 0.01220(9) 0.13577(11) 0.0159(3) Uani 1 1 d . . . 
O9 O 1.05074(18) -0.03234(7) 0.13133(8) 0.0210(2) Uani 1 1 d . . . 
O10 O 0.75936(19) 0.06050(7) 0.05062(9) 0.0221(2) Uani 1 1 d . . . 
N11 N 1.0698(2) -0.26554(8) 0.50384(10) 0.0176(2) Uani 1 1 d . . . 
N12 N 1.1366(2) -0.32331(8) 0.54724(11) 0.0233(3) Uani 1 1 d . . . 
B B 0.3415(3) 0.19018(10) 0.29421(13) 0.0165(3) Uani 1 1 d . . . 
F1 F 0.60171(15) 0.20010(5) 0.30248(7) 0.02202(19) Uani 1 1 d . . . 
F2 F 0.22037(16) 0.18058(6) 0.17872(7) 0.0254(2) Uani 1 1 d . . . 
F3 F 0.30189(16) 0.12024(5) 0.35573(7) 0.0248(2) Uani 1 1 d . . . 
F4 F 0.24668(18) 0.25867(6) 0.34008(8) 0.0297(2) Uani 1 1 d . . . 
H1 H 0.500(3) -0.1199(10) 0.2640(14) 0.021(4) Uiso 1 1 d . . . 
H2 H 0.634(3) -0.2385(11) 0.3730(14) 0.021(4) Uiso 1 1 d . . . 
H4 H 1.320(3) -0.1292(10) 0.5052(14) 0.022(4) Uiso 1 1 d . . . 
H5 H 1.186(3) -0.0118(11) 0.3947(15) 0.024(4) Uiso 1 1 d . . . 
H7A H 0.574(3) 0.0215(10) 0.2140(14) 0.022(4) Uiso 1 1 d . . . 
H7B H 0.815(3) 0.0690(12) 0.2779(16) 0.033(5) Uiso 1 1 d . . . 
H10 H 0.837(4) 0.0521(14) -0.012(2) 0.055(6) Uiso 1 1 d . . . 
 
loop_ 
 _atom_site_aniso_label 
 _atom_site_aniso_U_11 
 _atom_site_aniso_U_22 
 _atom_site_aniso_U_33 
 _atom_site_aniso_U_23 
 _atom_site_aniso_U_13 
 _atom_site_aniso_U_12 
C1 0.0160(6) 0.0229(7) 0.0146(6) -0.0030(5) 0.0038(5) -0.0011(5) 
C2 0.0186(6) 0.0207(7) 0.0183(7) -0.0038(5) 0.0068(5) -0.0061(5) 
C3 0.0209(6) 0.0131(7) 0.0142(6) 0.0019(5) 0.0063(5) 0.0004(5) 
C4 0.0161(6) 0.0185(7) 0.0163(6) 0.0008(5) 0.0033(5) -0.0014(5) 
C5 0.0186(6) 0.0171(7) 0.0172(6) -0.0005(5) 0.0044(5) -0.0031(5) 
C6 0.0174(6) 0.0193(7) 0.0126(6) -0.0016(5) 0.0058(5) 0.0023(5) 
C7 0.0194(6) 0.0205(7) 0.0175(6) 0.0009(5) 0.0053(5) 0.0041(5) 
C8 0.0160(6) 0.0154(6) 0.0154(6) 0.0009(5) 0.0014(5) -0.0002(5) 
O9 0.0224(5) 0.0239(5) 0.0176(5) 0.0039(4) 0.0065(4) 0.0074(4) 
O10 0.0228(5) 0.0269(6) 0.0173(5) 0.0057(4) 0.0057(4) 0.0093(4) 
N11 0.0212(6) 0.0165(6) 0.0168(5) -0.0024(5) 0.0076(4) -0.0027(5) 
N12 0.0298(6) 0.0190(6) 0.0214(6) -0.0008(5) 0.0061(5) -0.0020(5) 
B 0.0179(7) 0.0154(7) 0.0165(7) 0.0021(6) 0.0043(5) 0.0013(6) 
F1 0.0173(4) 0.0223(4) 0.0262(4) 0.0044(4) 0.0045(3) -0.0017(3) 
F2 0.0231(4) 0.0338(5) 0.0179(4) 0.0008(4) 0.0013(3) 0.0005(4) 
F3 0.0249(4) 0.0224(5) 0.0262(5) 0.0077(4) 0.0034(3) -0.0062(3) 
F4 0.0382(5) 0.0243(5) 0.0291(5) -0.0009(4) 0.0130(4) 0.0100(4) 
 
_geom_special_details 
; 
 All esds (except the esd in the dihedral angle between two l.s. planes) 
 are estimated using the full covariance matrix.  The cell esds are taken 
 into account individually in the estimation of esds in distances, angles 
 and torsion angles; correlations between esds in cell parameters are only 
 used when they are defined by crystal symmetry.  An approximate (isotropic) 
 treatment of cell esds is used for estimating esds involving l.s. planes. 
; 
 
loop_ 
 _geom_bond_atom_site_label_1 
 _geom_bond_atom_site_label_2 
 _geom_bond_distance 
 _geom_bond_site_symmetry_2 
 _geom_bond_publ_flag 
C1 C2 1.384(2) . ? 
C1 C6 1.397(2) . ? 
C1 H1 0.958(16) . ? 
C2 C3 1.3864(19) . ? 
C2 H2 0.943(17) . ? 
C3 C4 1.3939(19) . ? 
C3 N11 1.4063(18) . y 
C4 C5 1.378(2) . ? 
C4 H4 0.955(16) . ? 
C5 C6 1.4023(18) . ? 
C5 H5 0.963(18) . ? 
C6 C7 1.503(2) . y 
C7 C8 1.508(2) . y 
C7 H7A 0.960(16) . ? 
C7 H7B 0.976(19) . ? 
C8 O9 1.2199(16) . y 
C8 O10 1.3201(16) . y 
O10 H10 0.94(2) . ? 
N11 N12 1.0948(17) . y 
B F4 1.3882(18) . y 
B F3 1.3958(18) . y 
B F2 1.3963(18) . y 
B F1 1.3963(17) . y 
 
loop_ 
 _geom_angle_atom_site_label_1 
 _geom_angle_atom_site_label_2 
 _geom_angle_atom_site_label_3 
 _geom_angle 
 _geom_angle_site_symmetry_1 
 _geom_angle_site_symmetry_3 
 _geom_angle_publ_flag 
C2 C1 C6 121.02(12) . . ? 
C2 C1 H1 118.9(10) . . ? 
C6 C1 H1 120.0(10) . . ? 
C1 C2 C3 116.58(13) . . ? 
C1 C2 H2 122.3(10) . . ? 
C3 C2 H2 121.1(10) . . ? 
C2 C3 C4 124.97(13) . . ? 
C2 C3 N11 117.20(12) . . ? 
C4 C3 N11 117.77(12) . . ? 
C5 C4 C3 116.60(12) . . ? 
C5 C4 H4 121.3(10) . . ? 
C3 C4 H4 122.1(10) . . ? 
C4 C5 C6 121.00(13) . . ? 
C4 C5 H5 119.0(10) . . ? 
C6 C5 H5 120.0(10) . . ? 
C1 C6 C5 119.77(13) . . ? 
C1 C6 C7 120.26(12) . . ? 
C5 C6 C7 119.87(13) . . ? 
C6 C7 C8 111.11(12) . . y 
C6 C7 H7A 111.6(10) . . ? 
C8 C7 H7A 109.0(10) . . ? 
C6 C7 H7B 111.5(11) . . ? 
C8 C7 H7B 106.2(11) . . ? 
H7A C7 H7B 107.2(15) . . ? 
O9 C8 O10 123.58(13) . . y 
O9 C8 C7 123.22(12) . . y
O10 C8 C7 113.20(12) . . y 
C8 O10 H10 108.1(14) . . ? 
N12 N11 C3 178.14(14) . . y 
F4 B F3 109.52(12) . . y 
F4 B F2 110.21(12) . . y 
F3 B F2 109.54(12) . . y 
F4 B F1 109.44(12) . . y 
F3 B F1 109.04(11) . . y 
F2 B F1 109.06(12) . . y 
 
loop_ 
 _geom_torsion_atom_site_label_1 
 _geom_torsion_atom_site_label_2 
 _geom_torsion_atom_site_label_3 
 _geom_torsion_atom_site_label_4 
 _geom_torsion 
 _geom_torsion_site_symmetry_1 
 _geom_torsion_site_symmetry_2 
 _geom_torsion_site_symmetry_3 
 _geom_torsion_site_symmetry_4 
 _geom_torsion_publ_flag 
C6 C1 C2 C3 1.1(2) . . . . ? 
C1 C2 C3 C4 1.1(2) . . . . ? 
C1 C2 C3 N11 -176.19(12) . . . . ? 
C2 C3 C4 C5 -1.6(2) . . . . ? 
N11 C3 C4 C5 175.71(12) . . . . ? 
C3 C4 C5 C6 -0.1(2) . . . . ? 
C2 C1 C6 C5 -2.6(2) . . . . ? 
C2 C1 C6 C7 173.65(13) . . . . ? 
C4 C5 C6 C1 2.1(2) . . . . ? 
C4 C5 C6 C7 -174.17(13) . . . . ? 
C1 C6 C7 C8 -99.00(15) . . . . ? 
C5 C6 C7 C8 77.27(16) . . . . ? 
C6 C7 C8 O9 -17.40(19) . . . . y 
C6 C7 C8 O10 162.48(12) . . . . y 
C2 C3 N11 N12 75(4) . . . . ? 
C4 C3 N11 N12 -102(4) . . . . ? 
 
loop_ 
 _geom_hbond_atom_site_label_D 
 _geom_hbond_atom_site_label_H 
 _geom_hbond_atom_site_label_A 
 _geom_hbond_distance_DH 
 _geom_hbond_distance_HA 
 _geom_hbond_distance_DA 
 _geom_hbond_angle_DHA 
 _geom_hbond_site_symmetry_A
 _geom_hbond_publ_flag
C7 H7B F1  0.976(19) 2.472(19) 3.2192(18) 133.1(14) .     y
O10 H10 O9  0.94(2) 1.70(2) 2.6377(15) 174(2) 3_755       y
C1 H1 F4  0.958(16) 2.546(17) 3.2076(17) 126.4(13) 2_545  y
C2 H2 F2  0.943(17) 2.292(17) 3.1919(17) 159.4(14) 2_545  y
C4 H4 F1  0.955(16) 2.518(17) 3.1328(17) 122.2(12) 3_756  y
C4 H4 F3  0.955(16) 2.333(17) 3.2814(17) 171.6(14) 3_756  y
C5 H5 F3  0.963(18) 2.313(18) 3.2158(17) 155.8(14) 1_655  y
#===========================================================================
